# Supplementary material
Source: publisher figshare collection journal article supplement (https://acs.figshare.com/ndownloader/files/3788956)
Supplement: Supplementary file 1 [file 3788956]

**Supporting Information**

**Low Cost Copper Nanostructures Impart High Efficiencies to  
Quantum Dot Solar Cells**

**P. Naresh Kumar,<sup>a</sup> Melepurath Deepa,<sup>a,\*</sup> Partha Ghosal<sup>b</sup>**

*<sup>a</sup>Department of Chemistry, Indian Institute of Technology Hyderabad, Ordnance Factory Estate,  
Yeddumailaram-502205, Telangana (India).*

*<sup>b</sup>Defence Metallurgical Research Laboratory, DRDO, Hyderabad-500058, Telangana (India).*

*\*Email: mdeepa@iith.ac.in (Corresponding Author)*

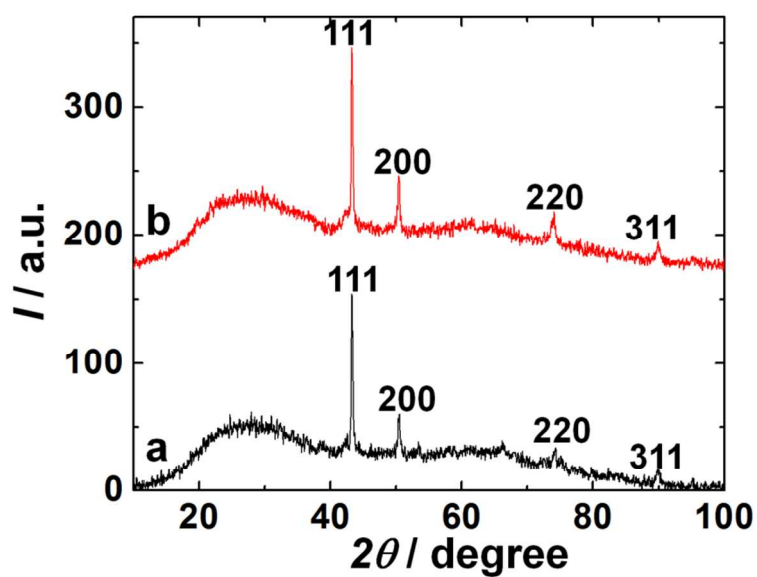

Figure S1 XRD patterns of (a) Cu NPs and (b) Cu NNs.

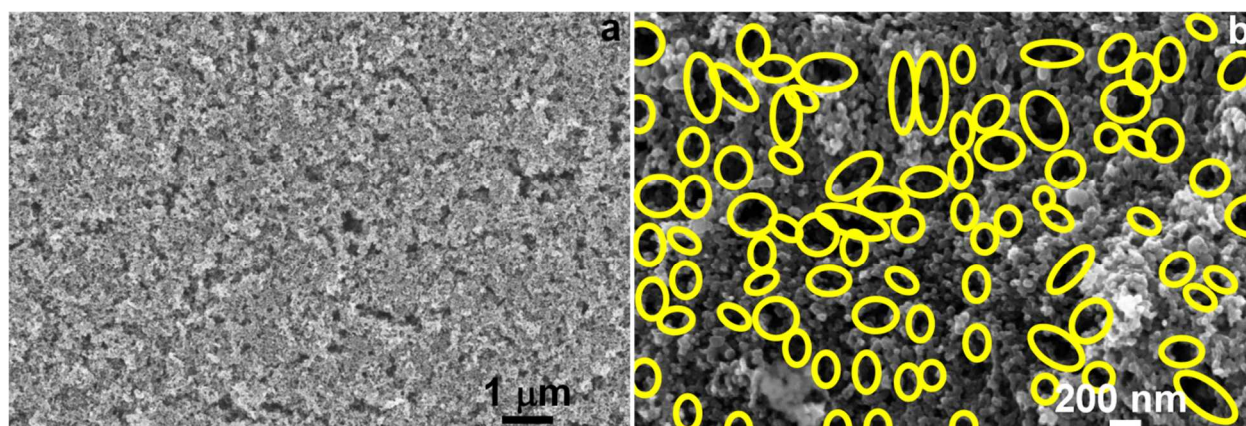

Figure S2 (a) Low and (b) high magnification FE-SEM images of a  $\text{TiO}_2/\text{CdS}$  electrode; the ellipses/circles in (b) enclose the pores present in the film.

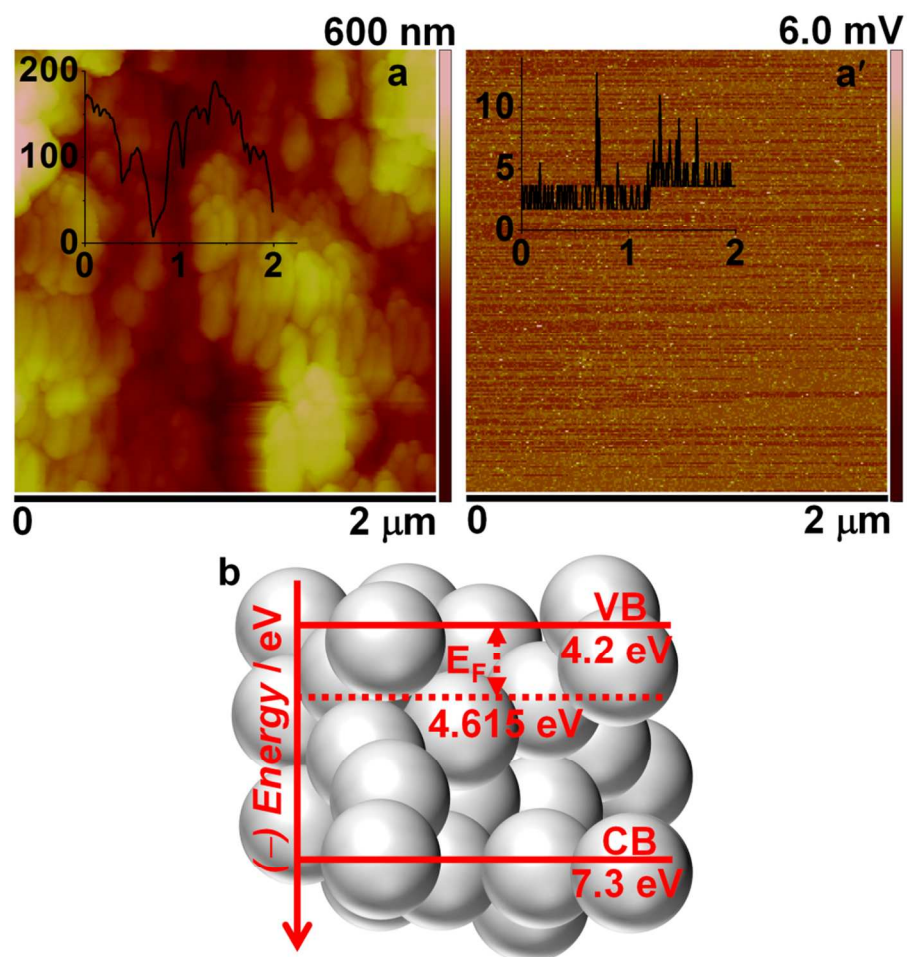

Figure S3 (a) Topography and (b) surface potential maps of a pristine  $\text{TiO}_2$  electrode and (c) schematic of the energy levels of pristine  $\text{TiO}_2$ . Insets of (a) and (b) are the corresponding section profiles.

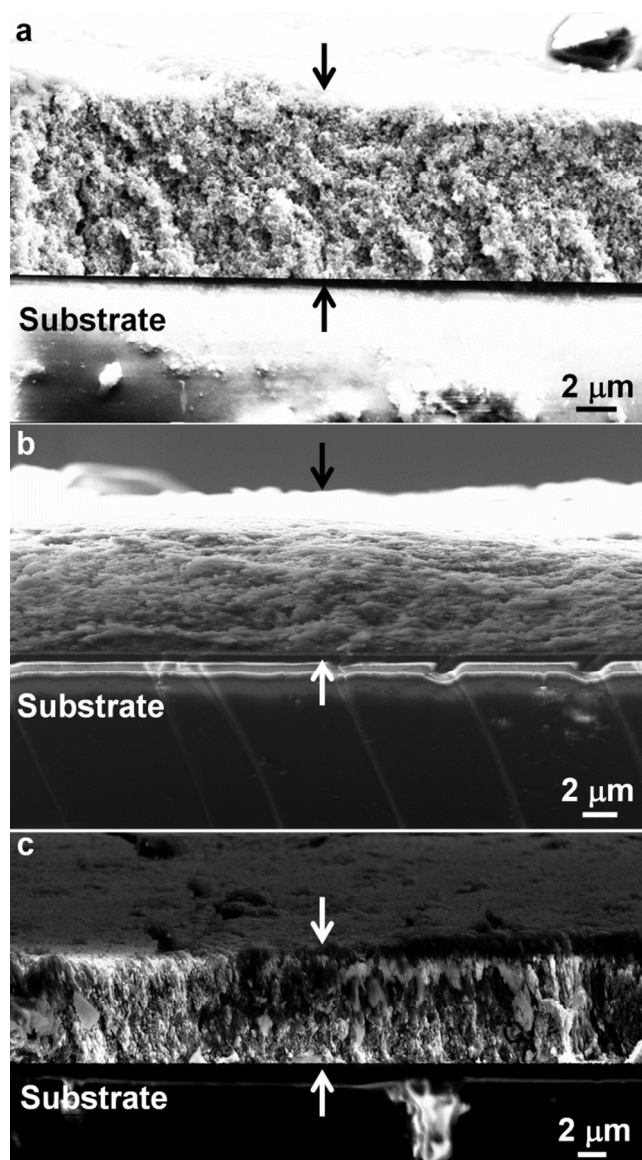

Figure S4 Cross-sectional SEM views of (a)  $\text{TiO}_2/\text{CdS}$ , (b)  $\text{TiO}_2/\text{CdS}/\text{Cu}$  NPs and (c)  $\text{TiO}_2/\text{CdS}/\text{Cu}$  NNs electrodes.

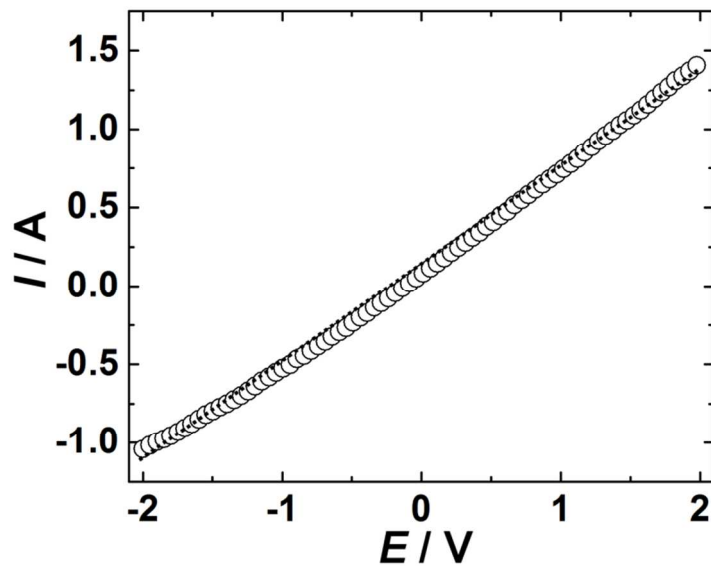

Figure S5 Linear sweep voltammogram of carbon fabric (current collector); the dotted line is the linear fit used for determining conductance (G) using  $G = 1/R = I/V$  (slope).

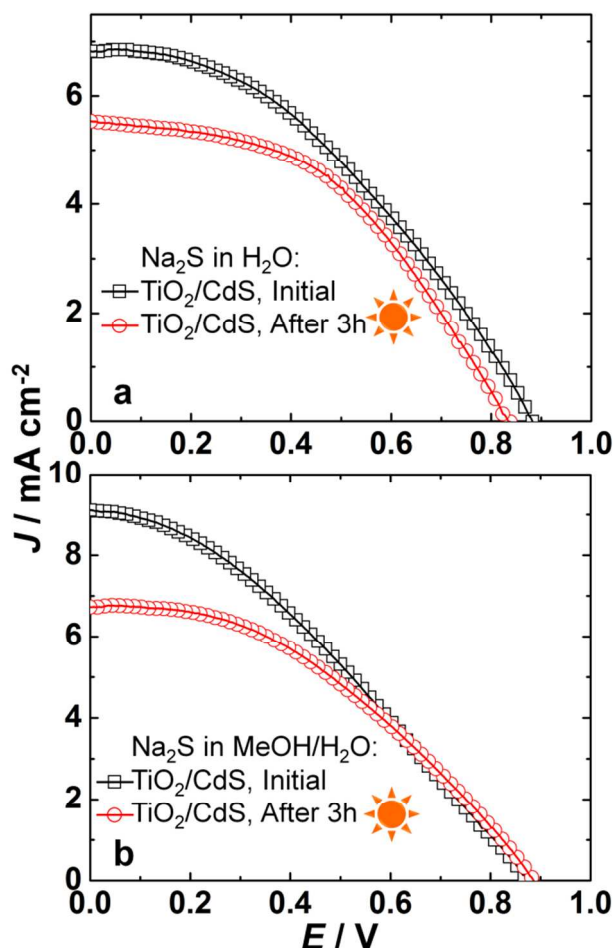

Figure S6 J-V characteristics of QDSCs with a TiO<sub>2</sub>/CdS film as the photoanode and a carbon fabric as the counter electrode, measured under 1 sun illumination (AM 1.5G spectrum): (a) in a 0.1 M Na<sub>2</sub>S solution in deionized water, and (b) in a 0.1 M Na<sub>2</sub>S solution in 3:7 v/v of water: methanol.

Table S1 Solar cell parameters for QDSCs based on a TiO<sub>2</sub>/CdS photoanode in different electrolytes.

| Electrolyte type                                             | V <sub>oc</sub><br>(mV) | J <sub>sc</sub><br>(mA cm <sup>-2</sup> ) | FF   | η (%) |
|--------------------------------------------------------------|-------------------------|-------------------------------------------|------|-------|
| Initial (0.1 M Na <sub>2</sub> S/H <sub>2</sub> O)           | 879                     | 6.813                                     | 0.39 | 2.387 |
| After 3 h (0.1 M Na <sub>2</sub> S/H <sub>2</sub> O)         | 836                     | 5.532                                     | 0.46 | 2.146 |
| Initial (0.1 M Na <sub>2</sub> S in MeOH:H <sub>2</sub> O)   | 869                     | 9.06                                      | 0.33 | 2.67  |
| After 3 h (0.1 M Na <sub>2</sub> S in MeOH:H <sub>2</sub> O) | 883                     | 6.74                                      | 0.40 | 2.41  |

Table S2 Solar cell parameters of cells by considering standard deviation using 0.1 M Na<sub>2</sub>S electrolyte, exposed cell area: 0.12 to 0.15 cm<sup>2</sup>, under 1 sun illumination (AM1.5G, 100 mW cm<sup>-2</sup>) with the listed photoanodes; all cells with a carbon fabric as the counter electrode.

| Photoanode                   | V <sub>OC</sub><br>(mV) | J <sub>SC</sub><br>(mA cm <sup>-2</sup> ) | FF             | η<br>(%)      |
|------------------------------|-------------------------|-------------------------------------------|----------------|---------------|
| TiO <sub>2</sub> /CdS        | 863.25 ± 13.6           | 8.03 ± 0.04                               | 0.392 ± 0.001  | 2.715 ± 0.065 |
| TiO <sub>2</sub> /CdS/Cu NPs | 886 ± 5.0               | 8.60 ± 0.06                               | 0.415 ± 0.015  | 3.15 ± 0.15   |
| TiO <sub>2</sub> /CdS/Cu NNs | 916.2 ± 3.3             | 9.84 ± 0.18                               | 0.465 ± 0.0002 | 4.23 ± 0.13   |

Table S3 Stability test for cells based on TiO<sub>2</sub>/CdS/Cu NNs containing 0.1 M Na<sub>2</sub>S as electrolyte and a carbon fabric as the counter electrode.

| Photoanode                                                                                                  | V <sub>OC</sub><br>(mV) | J <sub>SC</sub><br>(mA cm <sup>-2</sup> ) | FF    | η<br>(%) |
|-------------------------------------------------------------------------------------------------------------|-------------------------|-------------------------------------------|-------|----------|
| TiO <sub>2</sub> /CdS/Cu NNs<br>(As-fabricated)                                                             | 919.50                  | 10.02                                     | 0.47  | 4.36     |
| TiO <sub>2</sub> /CdS/Cu NNs<br>(As-fabricated)                                                             | 913.00                  | 9.70                                      | 0.465 | 4.1      |
| TiO <sub>2</sub> /CdS/Cu NNs<br>(4.36% Cell: After exposure to discontinuous 1 sun<br>illumination for 3 h) | 863.25                  | 8.625                                     | 0.45  | 3.345    |
| TiO <sub>2</sub> /CdS/Cu NNs<br>(4.1% Cell: After storage in dark for 1 month)                              | 868.45                  | 9.21                                      | 0.44  | 3.51     |
